# Supplementary material
Source: Springer Nature journal article supplement (https://www.springermedizin.de/resource/supplementary/12933_2010_238_MOESM1_ESM.pdf/9539910)

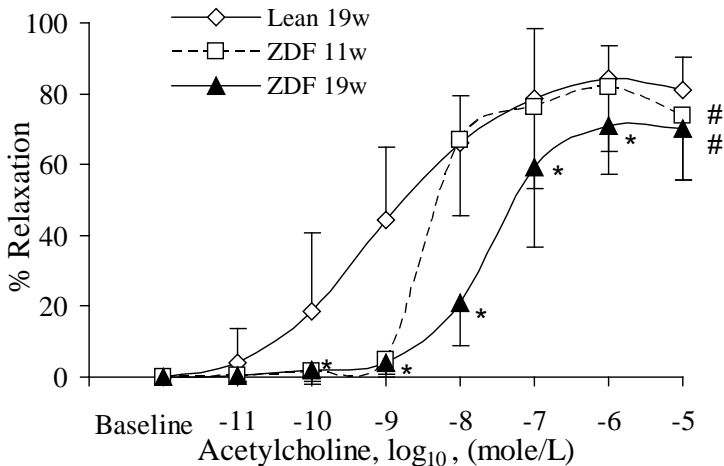

(A)

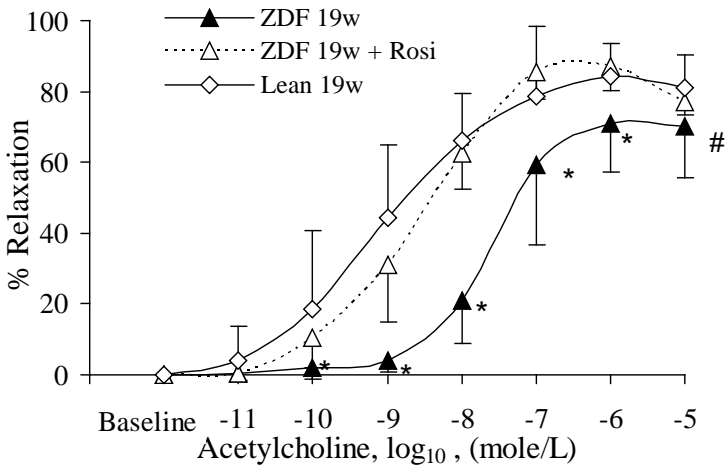

(B)

Supplement: MOESM1 [file 9539910]
